# Supplementary material for: Computerized Assessment of the Tumor-stromal Ratio and Proposal of a Novel Nomogram for Predicting Survival in Invasive Breast Cancer
Source: PubMed Central journal article supplement (PMC8120167; doi:10.7150/jca.55750), 2021-04-19
Supplement: jcav12p3427s1.pdf [file jcav12p3427s1.pdf]

**Supplementary Table 1** Analysis of characteristics regarding 5-DFS

| Characteristics              | Total (N=240) | No. of disease<br>(%) | 5-DFS rate<br>(%) | P value |
|------------------------------|---------------|-----------------------|-------------------|---------|
| <b>Age (years)</b>           |               |                       |                   | 0.182   |
| ≤ 50                         | 149 (62.1)    | 55 (60.4)             | 63.1              |         |
| > 50                         | 91 (37.9)     | 36 (39.6)             | 60.4              |         |
| <b>Menopausal status</b>     |               |                       |                   | <0.001  |
| Premenopausal                | 134 (55.8)    | 45 (49.5)             | 66.4              |         |
| Postmenopausal               | 106 (44.2)    | 46 (50.5)             | 56.6              |         |
| <b>Histological type</b>     |               |                       |                   | <0.001  |
| Invasive ductal<br>carcinoma | 191 (79.6)    | 78 (85.7)             | 59.2              |         |
| Others                       | 49 (20.4)     | 13 (14.3)             | 73.5              |         |
| <b>T stage (cm)</b>          |               |                       |                   | <0.001  |
| T1 (T ≤ 2)                   | 35 (15.0)     | 4 (4.4)               | 88.6              |         |
| T2 (2 < T ≤ 5)               | 162 (67.5)    | 60 (65.9)             | 63.0              |         |
| T3 (T > 5)                   | 43 (17.5)     | 27 (28.7)             | 37.2              |         |
| <b>N status</b>              |               |                       |                   | <0.001  |
| N negative                   | 109 (45.4)    | 17 (18.7)             | 84.4              |         |
| N positive                   | 131 (54.6)    | 74 (81.3)             | 43.5              |         |
| <b>Histological grade</b>    |               |                       |                   | <0.001  |
| I                            | 40 (16.7)     | 4 (4.4)               | 90.0              |         |
| II                           | 141 (58.8)    | 40 (43.9)             | 71.6              |         |
| III                          | 59 (24.6)     | 47 (51.7)             | 20.3              |         |
| <b>ER status</b>             |               |                       |                   | <0.001  |
| Positive                     | 106 (44.2)    | 25 (27.5)             | 76.4              |         |
| Negative                     | 134 (55.8)    | 66 (72.5)             | 50.7              |         |
| <b>PR status</b>             |               |                       |                   | <0.001  |
| Positive                     | 107 (44.6)    | 31 (33.7)             | 71.0              |         |

|                   |            |           |        |
|-------------------|------------|-----------|--------|
| Negative          | 133 (55.4) | 61 (66.3) | 54.1   |
| <b>HER2 gene</b>  |            |           | <0.001 |
| Amplification     | 51 (21.3)  | 29 (31.9) | 43.1   |
| Non-amplification | 189 (78.7) | 62 (68.1) | 67.2   |

T: tumor; N: node; 5-DFS: 5-year disease free survival; ER: estrogen receptor; PR: progesterone receptor; HER2: human epidermal growth factor receptor-2

### Dynamic Nomogram

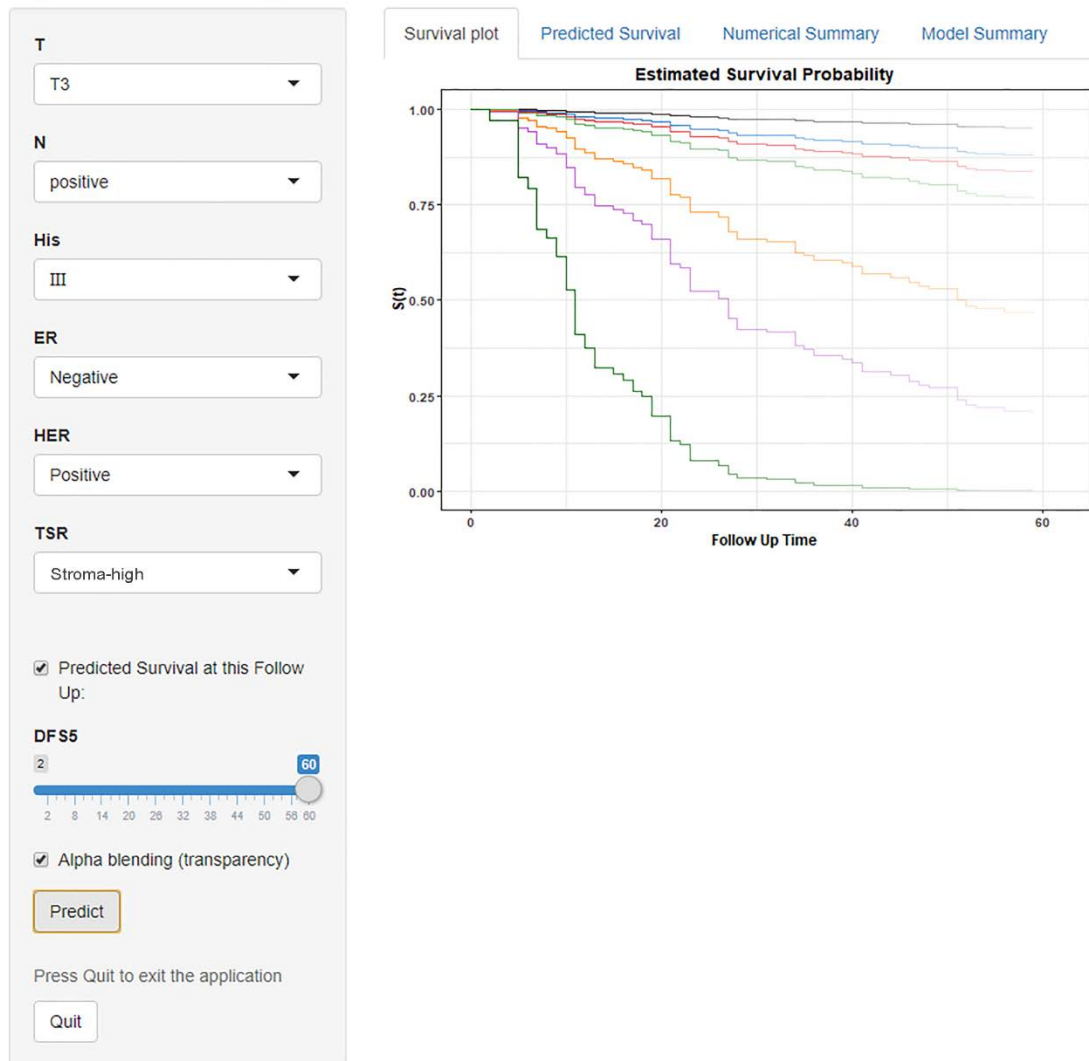

**Fig. S1** A dynamic version of the Nomogram

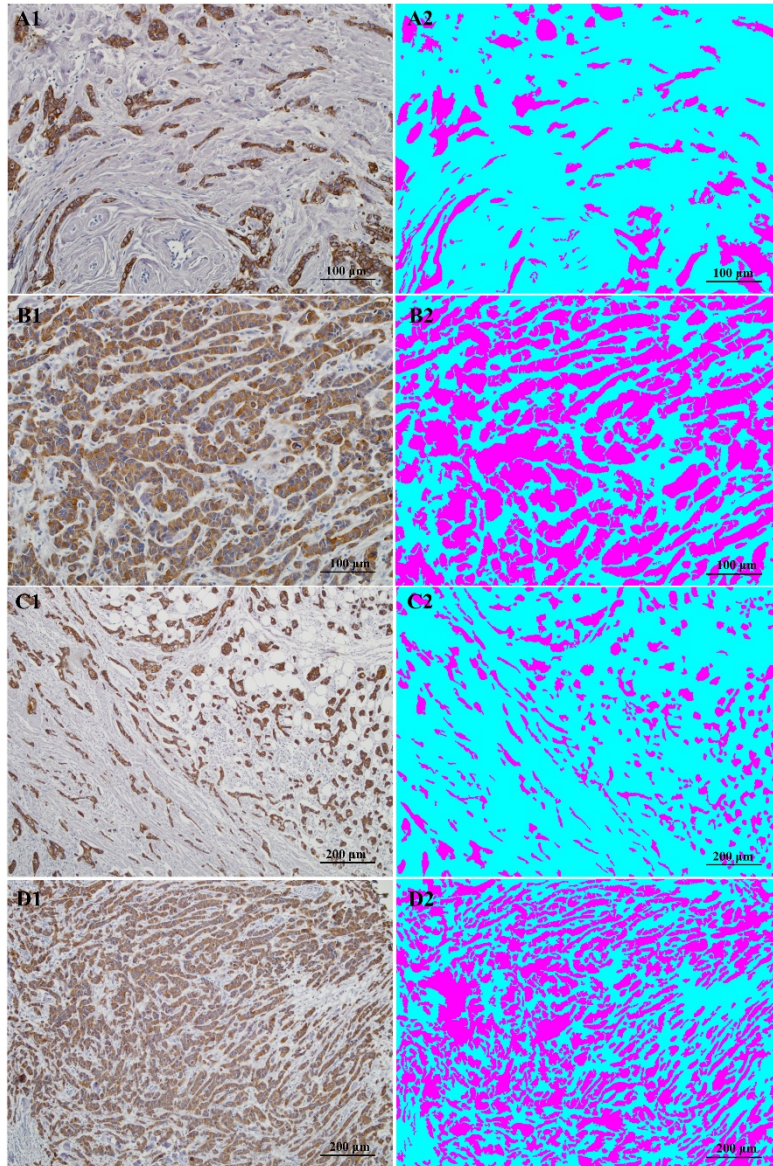

**Fig. S2** IHC staining images and computerized assessment results on microscopic fields. **Panels A1, A2** are examples of high stroma, with an estimated TSR of 83.9% (20× objective, scale bar=100µm). **Panels B1, B2** are examples of low stroma, with an estimated TSR of 52.6% (20× objective, scale bar=100µm). **Panels C1, C2** are examples of high stroma, with an estimated TSR of 83.4% (10× objective, scale bar=200µm). **Panels D1, D2** are examples of low stroma, with an estimated TSR of 45.4% (10× objective, scale bar=200µm).
